# Supplementary material
Source: Springer Nature journal article supplement (https://www.springermedizin.de/resource/supplementary/12936_2007_436_MOESM6_ESM.pdf/9547446)

**Linear Regression**

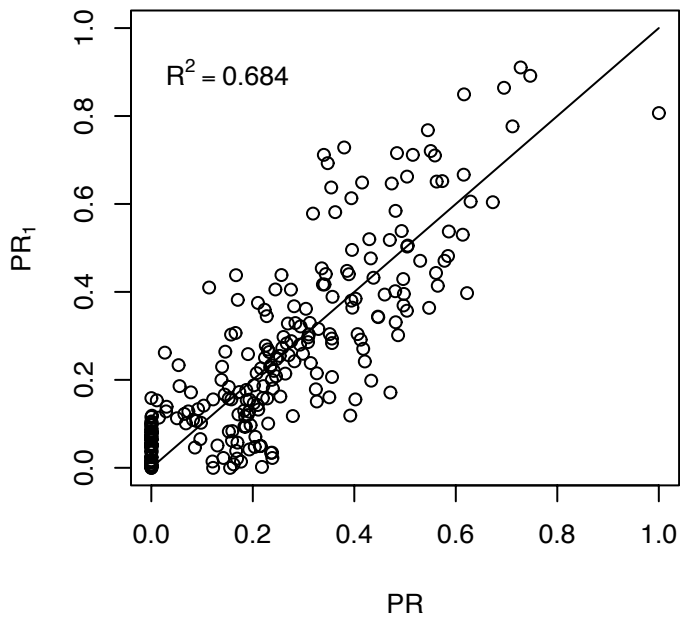

**Pull and Grab, Modified**

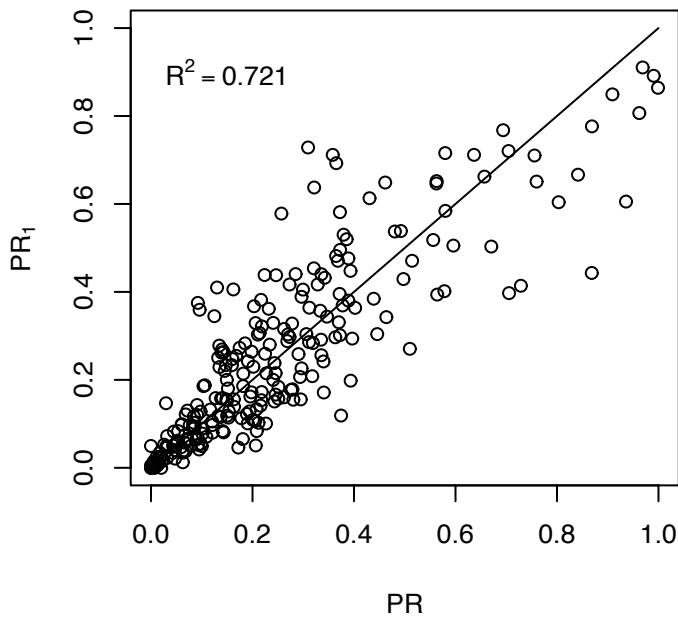

**Garki**

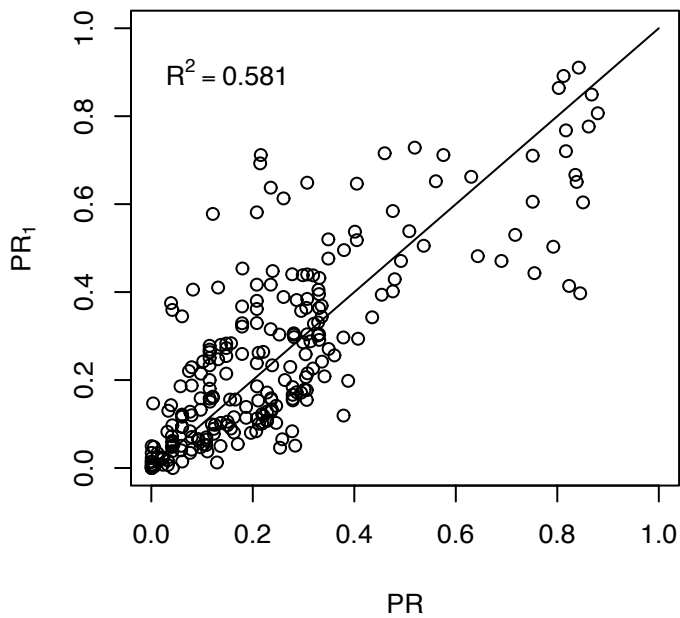

**Interpolation, z = 1.5**

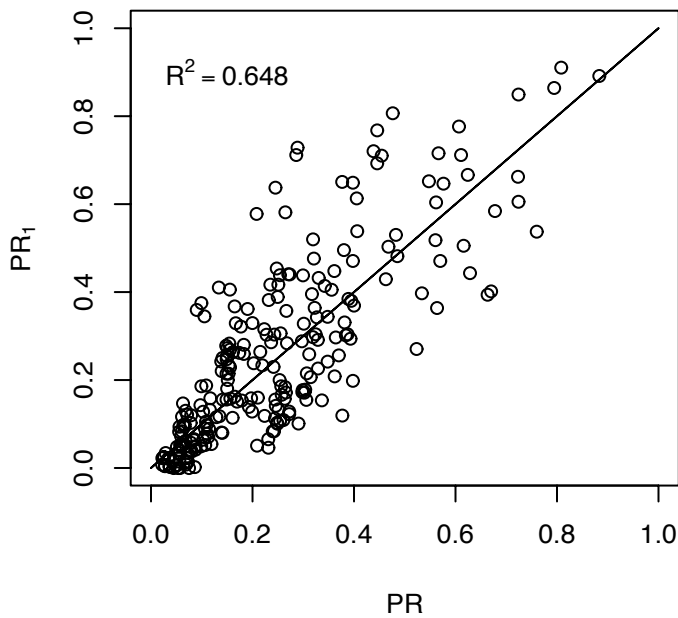

Supplement: MOESM6 [file 9547446]
